# Supplementary material for: Matched Whole-Genome Sequencing (WGS) and Whole-Exome Sequencing (WES) of Tumor Tissue with Circulating Tumor DNA (ctDNA) Analysis: Complementary Modalities in Clinical Practice
Source: MDPI journal article supplement (doi:10.3390/cancers11091399), 2019-09-19
Supplement: s1 [file cancers-571910-Supplementary Tables.xlsx]

## Sheet: Table S1
Supplemetary Table S1. List of genes from ctDNA targeted gene sequencing
Circulogene gene list (50 genes)	Guardant360 gene list (73 genes)
ABL1	AKT1
AKT1	ATM
ALK	CCNE1
APC	DDR2
ATM	FGFR1
BRAF	GNAS
CDH1	JAK3
CDKN2A	MAPK3/ERK1
CSF1R	NF1
CTNNB1	NTRK3
EGFR	RB1
ERBB2	SMAD4
ERBB4	VHL
EZH2	ALK
FBXW7	BRAF
FGFR1	CDH1
FGFR2	EGFR
FGFR3	HNF1A
FLT3	KIT
GNA11	MET
GNAQ	NFE2L2
GNAS	PDGFRA
HNF1A	RET
HRAS	SMO
IDH1	APC
IDH2	BRCA1
JAK2	CDK4
JAK3	ERBB2(HER2)
KDR	FGFR3
KIT	HRAS
KRAS	KRAS
MET	MLH1
MLH1	NOTCH1
MPL	PIK3CA
NOTCH1	RHEB
NPM1	STK11
NRAS	AR
PDGFRA	BRCA2
PIK3CA	CDK6
PTEN	ESR1
PTPN11	GATA3
RB1	IDH1
RET	MAP2K1/MEK1
SMAD4	MPL
SMARCB1	NPM1
SMO	PTEN
SRC	RHOA
STK11	TERT
TP53	ARAF
VHL	CCND1
BRCA1 AND BRCA2*	CDKN2A
	EZH2
	GNA11
	IDH2
	MAP2K2/MEK2
	MTOR
	NRAS
	PTPN11
	RIT1
	TP53
	ARID1A
	CCND2
	CTNBB1
	FBXW7
	GNAQ
	JAK2
	MAPK1/ERK2
	MYC
	NTRK1
	RAF1
	ROS1
	SC1

## Sheet: Table S2
Supplementary Table 2. Patient demographics
Patient	Gender	Tumor type	Biopsy site	Group	Tumor stage
	(M/F)
1	F	Ampullary carcinoma	Primary	GI	Stage IV
2	M	Bladder adenocarcinoma	Metastatic	OTHER	Stage IV
3	M	Bladder small cell carcinoma	Primary	OTHER	Stage IV
4	F	Breast adenocarcinoma (ER+, PR+, HER2-)	Metastatic	BREAST	Stage IV
5	F	Breast adenocarcinoma (TNBC)	Metastatic	BREAST	Stage IIIA
6	F	Breast adenocarcinoma (ER +, PR -, HER2 -)	Metastatic	BREAST	Stage IV
7	F	Breast adenocarcinoma (TNBC)	Metastatic	BREAST	Stage IV
8	F	Breast adenocarcinoma (ER+, PR+, HER2-)	Metastatic	BREAST	Stage IV
9	F	Breast adenocarcinoma (ER +, PR-, HER2-, BRCA1+)	Metastatic	BREAST	Stage IV
10	F	Breast adenocarcinoma (ER +, PR-, HER2-)	Metastatic	BREAST	Stage IV
11	F	Breast adenocarcinoma (ER+, PR+, HER2-)	Metastatic	BREAST	Stage IV
12	F	Breast adenocarcinoma (ER+, PR+, HER2-)	Metastatic	BREAST	Stage IV
14	F	Breast adenocarcinoma (TNBC)	Primary	BREAST	Stage IV
15	F	Breast adenocarcinoma (ER+, PR-, HER2-)	Metastatic	BREAST	Stage IV
16	F	Breast adenocarcinoma (ER+, PR-, HER2-)	Metastatic	BREAST	Stage IV
17	M	Cholangiocarcinoma	Metastatic	GI	Stage IV
18	F	Cholangiocarcinoma	Primary	GI	Stage IV
20	M	Cholangiocarcinoma	Primary	GI	Stage IIIB
21	F	Cholangiocarcinoma	Primary	GI	Stage IV
22	F	Cholangiocarcinoma	Primary	GI	Stage IV
23	F	Colorectal adenocarcinoma	Primary	GI	Stage IV
24	F	Colorectal adenocarcinoma	Metastatic	GI	Stage IV
25	F	Colorectal adenocarcinoma	Metastatic	GI	Stage IV
26	F	Colorectal adenocarcinoma	Metastatic	GI	Stage IV
27	F	Colorectal adenocarcinoma	Primary	GI	Stage IV
28	F	Colorectal adenocarcinoma	Primary	GI	Stage IIIA
31	F	Colorectal adenocarcinoma	Primary	GI	Stage IIIA
33	M	Head & neck squamous cell carcinoma	Primary	OTHER	Stage IV
34	F	Lung adenocarcinoma	Metastatic	LUNG	Stage IV
35	M	Lung adenocarcinoma	Primary	LUNG	Stage IV
36	M	Lung adenocarcinoma	Metastatic	LUNG	Stage IV
37	F	Lung adenocarcinoma	Primary	LUNG	Stage IV
38	F	Lung adenocarcinoma	Primary	LUNG	Stage IV
39	M	Lung adenocarcinoma	Metastatic	LUNG	Stage III
40	F	Lung adenocarcinoma	Metastatic	LUNG	Stage IV
41	M	Lung adenocarcinoma	Metastatic	LUNG	Stage IV
42	F	Lung adenocarcinoma	Primary	LUNG	Stage IV
43	F	Lung adenocarcinoma	Metastatic	LUNG	Stage IV
44	F	Lung adenocarcinoma	Metastatic	LUNG	Stage IIIB
45	M	Lung carcinoid	Metastatic	LUNG	Stage IV
46	F	Lung carcinoid	Metastatic	LUNG	Stage IV
47	F	Lung small cell carcinoma	Primary	LUNG	Stage IV
48	M	Lung small cell carcinoma	Metastatic	LUNG	Stage IV
49	F	Lung small cell carcinoma	Primary	LUNG	Stage IV
50	F	Lung small cell carcinoma	Metastatic	LUNG	Stage IV
51	M	Lung small cell carcinoma	Primary	LUNG	Stage IV
52	M	Lung squamous cell carcinoma	Primary	LUNG	Stage IIIA
53	F	Melanoma	Metastatic	OTHER	Stage IV
54	F	Pancreatic adenocarcinoma	Metastatic	GI	Stage IV
55	F	Pancreatic mucinous carcinoma	Metastatic	GI	Stage IV
56	M	Pancreatic adenocarcinoma	Metastatic	GI	Stage IV
57	M	Pancreatic adenocarcinoma	Metastatic	GI	Stage IV
58	M	Pancreatic adenocarcinoma	Metastatic	GI	Stage IV
59	M	Pancreatic adenocarcinoma	Primary	GI	Stage IV
60	M	Prostate adenocarcinoma	Primary	OTHER	Stage IV
61	F	Colorectal adenocarcinoma	Metastatic	GI	Stage IV
62	F	Renal cell carcinoma	Primary	OTHER	Stage IV
63	F	Salivary gland carcinoma	Metastatic	OTHER	Stage IV
64	M	Sarcoma	Primary	OTHER	Stage IIIB
66	M	Thymus	Primary	OTHER	Stage IV
67	F	Adenocarcinoma, unknown primary	Metastatic	OTHER	Stage IV
68	M	Squamous Cell Carcinoma, unknown primary	Metastatic	OTHER	Stage IV
69	F	Urachus Cancer	Metastatic	OTHER	Stage IV
70	M	Head & neck squamous cell carcinoma	Primary	OTHER	Stage IV
Abbreviations: ER = estrogen receptor; PR = progesterone receptor; TNBC = triple negative breast cancer; HER2 = human epidermal growth factor receptor 2

## Sheet: Table S3
Supplementary Table 3. Patients who received chemotherapy with concordant gene(s) and mutation(s)
Pt #	Tumor type	Concordant gene(s)	Concordant mutation(s)	Initial therapy	Therapy changes based on tumor progression
1	Ampullary Carcinoma	KRAS	G12C	FOLFOX	Capecitabine
					Gemcitabine + cisplatin
					FOLFIRI
2	Bladder adenocarcinoma	MET/TP53	V176M/E285K	Gemcitabine + cisplatin	Atezolizumab
					Pemetrexed
					Gemcitabine + nab-paclitaxel
4	Breast carcinoma (ER/PR pos, HER2 neg)	NOTCH1/PIK3CA	E398K/N345K	Dose dense adriamycin/ cyclophosphamide followed by paclitaxel	Tamoxifen
					Fulvestrant and anastrazole
					Denosumab
					Fulvestrant and palbociclib
					Abraxane, pertuzamab, traztuzumab
					Kadcyla
					Herceptin
					Herceptin plus capecitabine plus tucatinib or placebo
5	Breast carcinoma	-	-	ABBVIE neoadjuvant velapirib	Neoadjuvant paclitaxel plus or minus carboplatin, plus or minus veleparib, followed by 4 cycles of dose dense adriamycin+cyclophosphamide
	(TNBC)
					Research study G1 therapeutics, carboplatin and gemcitabine plus trilaciclib
					Research study BGB324 + pembrolizumab
6	Breast carcinoma (ER pos, PR neg, HER2 neg)	AKT1/TP53	E17K/E196*	Tamoxifen	Paclitaxel
					Neratinib and fulvestrant
7	Breast carcinoma	TP53	R175H	Dose dense adriamycin/ cyclophosphamide followed by paclitaxel	Carboplatin and gemcitabine
	(TNBC)
					BGB324 study drug with pembrolizumab, erbulin, pembrolizumab, carboplatin and gemcitabine
8	Breast carcinoma (ER/PR pos, HER2 neg)	FGFR1/CDK4	AMP/AMP	Neoadjuvant Docetaxel, Anthracycline and Cyclophosphamide	Anastrazole
					Fulvestrant and palbociclib
9	Breast carcinoma	-	-	Carboplatin and paclitaxel followed by adriamycin/ cyclophosphamide	Tamoxifen
	(ER pos, PR neg, HER2 neg, BRCA1 pos)
					Research abbvie carbo or paclitaxel +/-PARP inhibitor
					Veliparib, letrozole and palbociclib
10	Breast carcinoma	NF1/PIK3CA/PIK3CA	A330E/E545Q/H1047L	dose dense adriamycin/ cyclophosphamide followed by	Paclitaxel, Lupron, Arimidiex, Palbociclib.
	(ER pos, PR neg, HER2 neg)			paclitaxel
					Faslodex + Xgeva
					Palbociclib + fulvestrant
					Capecitabine
					Tamoxifen + everolimus
					Gemcitabine
11	Breast carcinoma	PIK3CA	H1047R	Adriamycin/ cyclophosphamide followed by paclitaxel	Herceptin and HER2 vaccine, adjuvant tamoxifen, letrozole and palbociclib
	(ER/PR pos, HER2 neg)
12	Breast carcinoma	PIK3CA	N354K	Adriamycin/cyclophosphamide	Adjuvant tamoxifen x 2 years, anastrazole/denosumab
	(ER/PR pos, HER2 neg)
					Fulvestrant and palbociclib
					Exemestane and everolimus
14	Breast carcinoma	TP53	R175H	Adjuvant taxotere/carboplatin/Herceptin x 6 cycles followed by 1 year of adjuvant Herceptin	Cisplatin/romidespin x 2 cycles, adriamycin/cytoxan x 4 cycles
	(TNBC)
					Abraxane, eribulin
					Doxorubicin, pembrolizumab, gemcitabine
15	Breast carcinoma	ESR1	D538G	FEC-100 (5 fluorouracil epirubicin, cyclophosphamide) x 3 cycles, taxotere 3 cycles	Anastrozole, zoledronic acid, fluvestrant +/- erlotinib, xeloda, letrozole and everolimus, abraxane, denosumab, fulvestrant and palbociclib, exemestane and everolimus, doxorubicin
	(ER pos, PR neg, HER2 neg)
16	Breast carcinoma	ESR1/RHOA	E380Q/G17E	Docetaxel, cyclophosphomide	Letrozole.
	(ER pos, PR neg, HER2 neg)
					Anastrozole.
					Fulvestant and palbociclib.
34	Lung adenocarcinoma	KRAS	G12C	Geftinib	Crizotinib.
					Carboplatin and pemetrexed.
					Pembrolizumab
35	Lung adenocarcinoma	KRAS	G12C	Carboplatin, pemetrexed	Pembrolizumab
					Carboplatin, pemetrexed
36	Lung adenocarcinoma	KRAS	G12V	Cisplatin + gemcitabine	-
37	Lung adenocarcinoma	TP53/KRAS	H115fs/G12C	Carboplatin, paclitaxel, bevacizumab	-
38	Lung adenocarcinoma			Carboplatin, pemetrexed	-
41	Lung adenocarcinoma	ARID1A	D18050fs	Carboplatin, pemetrexed	-
42	Lung adenocarcinoma	TP53	N30fs	Carboplatin, pemetrexed	-
46	Lung carcinoid tumor	TP53/RB1	Y220C/Y805*	Carboplatin + etoposide	-
47	Lung, small cell carcinoma			Carboplatin + etoposide	-
49	Lung, small cell carcinoma	ARID1A/CDK4/TP53	I2067F/V57L/T125R	Carboplatin + etoposide	-
56	Pancreatic adenocarcinoma	-	-	FOLFIRINOX	Trametinib and dabrafenib
61	Colorectal carcinoma			FOLFOX + bevacizumab	-
69	Urachus Cancer	TP53	S241C	FOLFOX	Gemcitabine + paclitaxel

## Sheet: Table S4 All Cancers
Supplemental Table 4 all patients with documented tissue TMB on sequencing report
Patient ID	Cancer	ctDNA muts	Tumor muts	TMB	Chemo
70	HNSCC	0	22	0.7	INBETWEEN
21	Cholangiocarcinoma	0	22	1.4	INBETWEEN
22	Cholangiocarcinoma	1	20	1.9	INBETWEEN
23	Colorectal	2	29	2.1	INBETWEEN
43	Lung Adenocarcinoma	3	130	3.1	INBETWEEN
44	Lung Adenocarcinoma	6	25	3.4	INBETWEEN
31	Colorectal	1	31	3.7	INBETWEEN
52	Lung Squamous Cell	9	29	4	INBETWEEN
33	HNSCC	20	234	15.3	INBETWEEN
60	Prostate	0	20	0.5	Naive
20	Cholangiocarcinoma	2	25	0.7	Naive
18	Cholangiocarcinoma	5	25	0.8	Naive
64	Sarcoma	3	22	0.9	Naive
54	Pancreatic	8	20	1.3	Naive
57	Pancreatic	3	22	1.5	Naive
63	Salivary Gland Carcinoma	0	27	1.5	Naive
59	Pancreatic	2	63	1.6	Naive
17	Cholangiocarcinoma	4	47	1.7	Naive
62	Renal Cell Carcinoma	4	25	1.7	Naive
3	Bladder Small Cell	2	89	1.9	Naive
26	Colorectal	8	87	1.9	Naive
28	Colorectal	2	26	2.4	Naive
24	Colorectal	12	31	2.7	Naive
39	Lung Adenocarcinoma	0	138	2.9	Naive
40	Lung Adenocarcinoma	1	24	2.9	Naive
25	Colorectal	9	28	3.1	Naive
55	Pancreatic	2	20	4.2	Naive
51	Lung Small Cell	5	215	5.4	Naive
50	Lung Small Cell	4	97	6.9	Naive
27	Colorectal	10	42	7.3	Naive
53	Melanoma	1	320	8	Naive
45	Lung Carcinoid	6	57	8.7	Naive
66	Thymus	4	425	10.2	Naive
67	Unknown Adenocarcinoma	0	189	28.7	Naive
68	Unknown Squamous Cell Carcinoma	9	27	28.7	Naive
34	Lung Adenocarcinoma	3	1	0.1	Yes
6	Breast ER pos PR neg HER2 neg	5	48	1.1	Yes
16	Breast ER pos PR neg HER2 neg	2	57	1.1	Yes
12	Breast ER/PR pos HER2 neg	1	25	1.3	Yes
38	Lung Adenocarcinoma	4	25	1.3	Yes
10	Breast ER pos PR neg HER2 neg	4	25	1.5	Yes
14	Breast TNBC	4	26	1.9	Yes
61	Colorectal	10	20	2	Yes
15	Breast ER pos PR neg HER2 neg	6	29	2.1	Yes
8	Breast ER/PR pos HER2 neg	4	30	2.5	Yes
5	Breast TNBC	2	33	2.8	Yes
56	Pancreatic	1	23	3.2	Yes
9	Breast ER pos PR neg HER2 neg BRCA1 pos	2	46	3.6	Yes
36	Lung Adenocarcinoma	2	21	4.5	Yes
2	Bladder Adenocarcinoma	6	49	4.6	Yes
1	Ampullary Carcinoma	3	23	4.9	Yes
69	Urachus Cancer	7	31	5.1	Yes
11	Breast ER/PR pos HER2 neg	3	80	6.5	Yes
47	Lung Small Cell	6	320	8	Yes
46	Lung Carcinoid	5	150	9.1	Yes
49	Lung Small Cell	6	420	9.8	Yes
42	Lung Adenocarcinoma	2	25	10.9	Yes
37	Lung Adenocarcinoma	4	206	11.3	Yes
35	Lung Adenocarcinoma	2	126	11.6	Yes
41	Lung Adenocarcinoma	3	94	12.6	Yes
4	Breast ER/PR pos HER2 neg	20	398	43.9	Yes

## Sheet: Table S4 Lung
Supplemental Table 4 Lung cancer patients
Patient ID	Cancer	ctDNA muts	TMB	Tumor muts	Chemotherapy
34	Lung Adenocarcinoma	3	0.1	1	Yes
35	Lung Adenocarcinoma	2	11.6	126	Yes
36	Lung Adenocarcinoma	2	4.5	21	Yes
37	Lung Adenocarcinoma	4	11.3	206	Yes
38	Lung Adenocarcinoma	4	1.3	25	Yes
41	Lung Adenocarcinoma	3	12.6	94	Yes
42	Lung Adenocarcinoma	2	10.9	25	Yes
46	Lung Carcinoid	5	9.1	150	Yes
47	Lung Small Cell	6	8	320	Yes
49	Lung Small Cell	6	9.8	420	Yes
43	Lung Adenocarcinoma	3	3.1	130	INBETWEEN
44	Lung Adenocarcinoma	6	3.4	25	INBETWEEN
52	Lung Squamous Cell	9	4	29	INBETWEEN
50	Lung Small Cell	4	6.9	97	Naïve
51	Lung Small Cell	5	5.4	215	Naïve
39	Lung Adenocarcinoma	0	2.9	138	Naïve
40	Lung Adenocarcinoma	1	2.9	24	Naïve
45	Lung Carcinoid	6	8.7	57	Naïve
SUMMARY OUTPUT All Lung cancer
Regression Statistics
Multiple R	0.0730882
R Square	0.00534188
Adjusted R Square	-0.0568242
Standard Error	3.99752
Observations	18
ANOVA
	df	SS	MS	F	Significance F
Regression	1	1.37316	1.37316	0.0859292	0.773185
Residual	16	255.683	15.9802
Total	17	257.056
	Coefficients	Standard Error	t Stat	P-value	Lower 95%	Upper 95%	Lower 95.0%	Upper 95.0%
Intercept	5.9647	1.97113	3.02604	0.00803095	1.7861	10.1433	1.7861	10.1433
X Variable 1	0.128667	0.438932	0.293137	0.773185	-0.801827	1.05916	-0.801827	1.05916
SUMMARY OUTPUT of Chemotherapy naïve lung cancer patients
Regression Statistics
Multiple R	0.913409
R Square	0.834317
Adjusted R Square	0.779089
Standard Error	1.21659
Observations	5
ANOVA
	df	SS	MS	F	Significance F
Regression	1	22.3597	22.3597	15.1068	0.0301868
Residual	3	4.44031	1.4801
Total	4	26.8
	Coefficients	Standard Error	t Stat	P-value	Lower 95%	Upper 95%	Lower 95.0%	Upper 95.0%
Intercept	-1.80618	1.39821	-1.29178	0.286951	-6.25591	2.64355	-6.25591	2.64355
X Variable 1	0.933989	0.240301	3.88675	0.0301868	0.169245	1.69873	0.169245	1.69873
SUMMARY OUTPUT lung cancer patients who received chemotherapy
Regression Statistics
Multiple R	0.0281121
R Square	0.000790291
Adjusted R Square	-0.124111
Standard Error	1.66142
Observations	10
ANOVA
	df	SS	MS	F	Significance F
Regression	1	0.0174654	0.0174654	0.00632733	0.938553
Residual	8	22.0825	2.76032
Total	9	22.1
	Coefficients	Standard Error	t Stat	P-value	Lower 95%	Upper 95%	Lower 95.0%	Upper 95.0%
Intercept	3.62141	1.11906	3.23612	0.0119468	1.04086	6.20195	1.04086	6.20195
X Variable 1	0.00992354	0.124755	0.0795445	0.938553	-0.277761	0.297608	-0.277761	0.297608

## Sheet: Table S4 Breast
Supplemental Table 4 Breast cancer patients
Patient ID	Cancer	ctDNA muts	TMB	Tumor muts	Chemotherapy
4	Breast ER/PR pos HER2 neg	20	43.9	398	Yes
5	Breast TNBC	2	2.8	33	Yes
6	Breast ER pos PR neg HER2 neg	5	1.1	48	Yes
8	Breast ER/PR pos HER2 neg	4	2.5	30	Yes
9	Breast ER pos PR neg HER2 neg BRCA1 pos	2	3.6	46	Yes
10	Breast ER pos PR neg HER2 neg	4	1.5	25	Yes
11	Breast ER/PR pos HER2 neg	3	6.5	80	Yes
12	Breast ER/PR pos HER2 neg	1	1.3	25	Yes
14	Breast TNBC	4	1.9	26	Yes
15	Breast ER pos PR neg HER2 neg	6	2.1	29	Yes
16	Breast ER pos PR neg HER2 neg	2	1.1	57	Yes
SUMMARY OUTPUT of ALL Breast cancer patients / Breast cancer patients who received chemotherapy
Regression Statistics
Multiple R	0.947183
R Square	0.897155
Adjusted R Square	0.885728
Standard Error	1.77476
Observations	11
ANOVA
	df	SS	MS	F	Significance F
Regression	1	247.289	247.289	78.5104	9.69919e-06
Residual	9	28.3478	3.14976
Total	10	275.636
	Coefficients	Standard Error	t Stat	P-value	Lower 95%	Upper 95%	Lower 95.0%	Upper 95.0%
Intercept	2.36704	0.602385	3.92946	0.0034609	1.00436	3.72973	1.00436	3.72973
X Variable 1	0.394766	0.0445529	8.86061	9.69919e-06	0.29398	0.495552	0.29398	0.495552

## Sheet: Tabl S4 GI
Supplemental Table 4 GI cancer patients
Patient ID	Cancer	ctDNA muts	TMB	Tumor muts
21	Cholangiocarcinoma	0	1.4	22	INBETWEEN
22	Cholangiocarcinoma	1	1.9	20	INBETWEEN
23	Colorectal	2	2.1	29	INBETWEEN
31	Colorectal	1	3.7	31	INBETWEEN
17	Cholangiocarcinoma	4	1.7	47	Naïve
18	Cholangiocarcinoma	5	0.8	25	Naïve
20	Cholangiocarcinoma	2	0.7	25	Naïve
24	Colorectal	12	2.7	31	Naïve
25	Colorectal	9	3.1	28	Naïve
26	Colorectal	8	1.9	87	Naïve
27	Colorectal	10	7.3	42	Naïve
28	Colorectal	2	2.4	26	Naïve
55	Pancreatic	2	4.2	20	Naïve
57	Pancreatic	3	1.5	22	Naïve
59	Pancreatic	2	1.6	63	Naïve
54	Pancreatic	8	1.3	20	Naïve
1	Ampullary Carcinoma	3	4.9	23	Yes
56	Pancreatic	1	3.2	23	Yes
61	Colorectal	10	2	20	Yes
SUMMARY OUTPUT ALL GI Cancers
Regression Statistics
Multiple R	0.213273
R Square	0.0454855
Adjusted R Square	-0.0106624
Standard Error	3.78192
Observations	19
ANOVA
	df	SS	MS	F	Significance F
Regression	1	11.5868	11.5868	0.810102	0.380663
Residual	17	243.15	14.3029
Total	18	254.737
	Coefficients	Standard Error	t Stat	P-value	Lower 95%	Upper 95%	Lower 95.0%	Upper 95.0%
Intercept	3.2	1.65992	1.9278	0.0707562	-0.302128	6.70213	-0.302128	6.70213
X Variable 1	0.5	0.555521	0.900057	0.380663	-0.672046	1.67205	-0.672046	1.67205
SUMMARY OUTPUT Chemotherapy Naïve GI cancers
Regression Statistics
Multiple R	0.397378
R Square	0.157909
Adjusted R Square	0.0737001
Standard Error	3.49332
Observations	12
ANOVA
	df	SS	MS	F	Significance F
Regression	1	22.8837	22.8837	1.8752	0.200846
Residual	10	122.033	12.2033
Total	11	144.917
	Coefficients	Standard Error	t Stat	P-value	Lower 95%	Upper 95%	Lower 95.0%	Upper 95.0%
Intercept	3.661	1.72846	2.11806	0.0602194	-0.190259	7.51226	-0.190259	7.51226
X Variable 1	0.79	0.576903	1.36938	0.200846	-0.49542	2.07542	-0.49542	2.07542
SUMMARY OUTPUT GI Cancers after chemotherapy
Regression Statistics
Multiple R	0.670413
R Square	0.449454
Adjusted R Square	-0.101092
Standard Error	4.95894
Observations	3
ANOVA
	df	SS	MS	F	Significance F
Regression	1	20.0756	20.0756	0.816379	0.532234
Residual	1	24.5911	24.5911
Total	2	44.6667
	Coefficients	Standard Error	t Stat	P-value	Lower 95%	Upper 95%	Lower 95.0%	Upper 95.0%
Intercept	11.9867	8.5925	1.39501	0.395938	-97.1914	121.165	-97.1914	121.165
X Variable 1	-2.17425	2.40638	-0.903537	0.532234	-32.7502	28.4017	-32.7502	28.4017

## Sheet: Table S5a
Supplementary Table S5A. List of Concordant Hotspot Mutations
Sample Tumor Type	Gene	Hotspot
Ampullary Carcinoma	KRAS	G12
Bladder Adenocarcinoma	TP53	E285
Bladder Adenocarcinoma	TP53	R175
Bladder Adenocarcinoma	TP53	R175
Breast Adenocarcinoma	PIK3CA	E545
Breast Adenocarcinoma	PIK3CA	N345
Breast Adenocarcinoma	RHOA	G17
Cancer of Urachus	TP53	S241
Cholangiocarcinoma	IDH1	R132
Colorectal Adenocarcinoma	KRAS	G12
Colorectal Adenocarcinoma	KRAS	G12
Colorectal Adenocarcinoma	KRAS	Q61
Colorectal Adenocarcinoma	TP53	P250
Colorectal Adenocarcinoma	TP53	R213
Colorectal Adenocarcinoma	TP53	R248
Lung Adenocarcinoma	BRAF	G466
Lung Adenocarcinoma	KRAS	G12
Lung Adenocarcinoma	KRAS	G12
Lung Adenocarcinoma	KRAS	G12
Lung Adenocarcinoma	KRAS	G12
Lung Adenocarcinoma	KRAS	G13
Lung Carcinoid	TP53	Y220
Lung Small Cell Carcinoma	TP53	K132
Lung Small Cell Carcinoma	TP53	R273
Lung Small Cell Carcinoma	TP53	T125
Lung Small Cell Carcinoma	TP53	Y234
Lung Squamous Cell Carcinoma	TP53	R249
Melanoma	BRAF	V600
Pancreatic Adenocarcinoma	KRAS	G12
Pancreatic Adenocarcinoma	SMAD4	D351
Pancreatic Adenocarcinoma	TP53	C135

## Sheet: Table S5b
Supplementary Table S5B. List of Disconcordant Hotspot Mutations
Sample Tumor Type	Gene	Hotspot	Sample
Bladder Adenocarcinoma	TP53	C176	CTDNA
Bladder Adenocarcinoma	TP53	V143	CTDNA
Bladder Small Cell Carcinoma	TP53	R156	TUMOR
Breast Adenocarcinoma	AKT1	E17	CTDNA
Breast Adenocarcinoma	PIK3CA	N345	TUMOR
Breast Adenocarcinoma	SMAD4	R361	CTDNA
Breast Adenocarcinoma	TP53	E271	CTDNA
Breast Adenocarcinoma	TP53	R196	TUMOR
Breast Adenocarcinoma	TP53	R248	CTDNA
Breast Adenocarcinoma	TP53	R248	TUMOR
Breast Adenocarcinoma	TP53	V143	TUMOR
Breast Adenocarcinoma	TP53	Y220	CTDNA
Cholangiocarcinoma	BRAF	D594	CTDNA
Cholangiocarcinoma	BRAF	G469	CTDNA
Cholangiocarcinoma	NRAS	G12	CTDNA
Cholangiocarcinoma	TP53	G245	CTDNA
Colorectal Adenocarcinoma	CTNNB1	N387	TUMOR
Colorectal Adenocarcinoma	IDH1	R132	CTDNA
Colorectal Adenocarcinoma	TP53	R196	TUMOR
Colorectal Adenocarcinoma	TP53	R213	TUMOR
Colorectal Adenocarcinoma	TP53	R248	CTDNA
Colorectal Adenocarcinoma	TP53	R267	CTDNA
Head and neck squamous cell carcinoma	FBXW7	R465	CTDNA
Head and neck squamous cell carcinoma	TP53	R213	TUMOR
Lung Adenocarcinoma	KEAP1	G524	TUMOR
Lung Adenocarcinoma	KEAP1	R483	TUMOR
Lung Adenocarcinoma	KRAS	G13	TUMOR
Lung Adenocarcinoma	SF3B1	K666	TUMOR
Lung Adenocarcinoma	TP53	C238	TUMOR
Lung Adenocarcinoma	TP53	G279	CTDNA
Lung Adenocarcinoma	TP53	R213	TUMOR
Lung Neuroendocrine Carcinoma	TP53	H214	CTDNA
Lung Neuroendocrine Carcinoma	TP53	V272	TUMOR
Lung Small Cell Carcinoma	BRAF	V600	TUMOR
Lung Small Cell Carcinoma	SMAD4	Y353	CTDNA
Lung Small Cell Carcinoma	TP53	M237	CTDNA
Lung Small Cell Carcinoma	TP53	R175	CTDNA
Lung Small Cell Carcinoma	TP53	Y220	CTDNA
Lung Squamous Cell Carcionma	TP53	P177	CTDNA
Lung Squamous Cell Carcionma	TP53	Y220	CTDNA
Pancreatic Adenocarcinoma	EGFR	G724	CTDNA
Pancreatic Adenocarcinoma	KRAS	A59	CTDNA
Pancreatic Adenocarcinoma	KRAS	G12	TUMOR
Pancreatic Adenocarcinoma	KRAS	G12	TUMOR
Pancreatic Adenocarcinoma	KRAS	G12	TUMOR
Pancreatic Adenocarcinoma	PTPN11	E76	CTDNA
Pancreatic Adenocarcinoma	TP53	E180	CTDNA
Pancreatic Adenocarcinoma	TP53	P278	TUMOR
Pancreatic Adenocarcinoma	TP53	R280	CTDNA
Pancreatic Adenocarcinoma	TP53	R282	TUMOR
Renal Cell Carcinoma	IDH2	R140	CTDNA
Renal Cell Carcinoma	TP53	R196	CTDNA
Salivary Gland carcinoma	HRAS	K117	TUMOR
Salivary Gland carcinoma	PIK3CA	E545	TUMOR
Thymus Carcinoma	TP53	P278	TUMOR
Unknown Origin Adenocarcinoma	KRAS	G12	TUMOR
Unknown Origin Adenocarcinoma	KRAS	G12	TUMOR
Unknown Origin Adenocarcinoma	TP53	R273	TUMOR
Unknown Origin Adenocarcinoma	TP53	R273	TUMOR
Unknown Origin Squamous Cell Carcinoma	TP53	R175	CTDNA
